# Supplementary material
Source: PubMed Central journal article supplement (PMC5218816)
Supplement: NIHMS837332-supplement-01.pdf [file NIHMS837332-supplement-01.pdf]

## Supplementary materials

**Table S1** Regulatory network definition of edge and node by Cytoscape. In the third column 'Up/Dn', '+' indicates the corresponding gene in the first columns is up-regulated, while '-' indicates down-regulation. The number in the column 'Group' indicates the group, with 1 for up-regulated genes, -1 for down-regulated genes, -2 for hub TFs, and 2 for TCF7L2

| <i>Edge</i>       |                   |              | <i>Node</i> |              |
|-------------------|-------------------|--------------|-------------|--------------|
| <i>Name_Node1</i> | <i>Name_Node2</i> | <i>Up/Dn</i> | <i>Name</i> | <i>Group</i> |
| ARSB              | CAD               | +            | ARSB        | 1            |
| COL5A1            | CAD               | +            | ATP7B       | 1            |
| GALC              | CAD               | +            | COL5A1      | 1            |
| ITGA6             | CAD               | +            | GALC        | 1            |
| THBD              | CAD               | +            | ITGA6       | 1            |
| COL5A2            | CAD               | +            | TGFBI       | 1            |
| APP               | CAD               | +            | THBD        | 1            |
| CXCL12            | CAD               | +            | CDKN1A      | 1            |
| CYP24A1           | CAD               | +            | COL5A2      | 1            |
| MAOB              | CAD               | +            | EXT2        | 1            |
| PAM               | CAD               | +            | APP         | 1            |
| PRLR              | CAD               | +            | CXCL12      | 1            |
| ATP2B1            | CAD               | +            | LTBP1       | 1            |
| SERPINA1          | CAD               | +            | CYP24A1     | 1            |
| MGLL              | CAD               | +            | MAOB        | 1            |
| TULP4             | CAD               | +            | NPR3        | 1            |
| ANO6              | CAD               | +            | PAM         | 1            |
| VEGFA             | CAD               | +            | PPP3CA      | 1            |
| GPR126            | CAD               | +            | PRLR        | 1            |
| MAP2              | CAD               | +            | ATP2B1      | 1            |
| EDN1              | CAD               | +            | SERPINA1    | 1            |

**Table S1** Regulatory network definition of edge and node by Cytoscape. In the third column 'Up/Dn', '+' indicates the corresponding gene in the first columns is up-regulated, while '-' indicates down-regulation. The number in the column 'Group' indicates the group, with 1 for up-regulated genes, -1 for down-regulated genes, -2 for hub TFs, and 2 for TCF7L2 (continued)

| <i>Edge</i>       |                   |              | <i>Node</i> |              |
|-------------------|-------------------|--------------|-------------|--------------|
| <i>Name_Node1</i> | <i>Name_Node2</i> | <i>Up/Dn</i> | <i>Name</i> | <i>Group</i> |
| FN1               | CAD               | +            | MGLL        | 1            |
| INHBA             | CAD               | +            | TULP4       | 1            |
| ITGB1             | CAD               | +            | SHISA2      | 1            |
| NT5E              | CAD               | +            | ANO6        | 1            |
| PTK7              | CAD               | +            | VEGFA       | 1            |
| RBMS1             | CAD               | +            | GPR126      | 1            |
| SORL1             | CAD               | +            | NPNT        | 1            |
| STC1              | CAD               | +            | CYFIP2      | 1            |
| YWHAZ             | CAD               | +            | FHL2        | 1            |
| DYRK2             | CAD               | +            | MAP2        | 1            |
| ENC1              | CAD               | +            | HIPK3       | 1            |
| WISP2             | CAD               | +            | BMPR2       | 1            |
| ASPH              | CAD               | +            | CDK8        | 1            |
| EPHA4             | CAD               | +            | DGKA        | 1            |
| RPS6KA3           | CAD               | +            | DDX3X       | 1            |
| ANXA3             | CAD               | +            | CAPN2       | 1            |
| RND3              | CAD               | +            | SLC31A2     | 1            |
| LMO7              | CAD               | +            | EDN1        | 1            |
| PTPN14            | CAD               | +            | FN1         | 1            |
| MAFB              | CAD               | +            | FRK         | 1            |
| ABCA1             | CAD               | +            | GOLGA4      | 1            |
| LHFPL2            | CAD               | +            | INHBA       | 1            |
| ZNF193            | CAD               | +            | ITGB1       | 1            |
| NEBL              | CAD               | +            | LAMC1       | 1            |
| TRIM16            | CAD               | +            | LRP1        | 1            |
| RAB31             | CAD               | +            | NT5E        | 1            |
| SLC35D2           | CAD               | +            | PDE7A       | 1            |
| PTPN21            | CAD               | +            | KLK6        | 1            |
| DDAH1             | CAD               | +            | PTK7        | 1            |
| MGAT4A            | CAD               | +            | RBMS1       | 1            |
| LPHN2             | CAD               | +            | SORL1       | 1            |
| C1orf9            | CAD               | +            | SOX4        | 1            |

**Table S1** Regulatory network definition of edge and node by Cytoscape. In the third column 'Up/Dn', '+' indicates the corresponding gene in the first columns is up-regulated, while '-' indicates down-regulation. The number in the column 'Group' indicates the group, with 1 for up-regulated genes, -1 for down-regulated genes, -2 for hub TFs, and 2 for TCF7L2 (continued)

| Edge       |            |       | Node    |       |
|------------|------------|-------|---------|-------|
| Name_Node1 | Name_Node2 | Up/Dn | Name    | Group |
| TNFRSF21   | CAD        | +     | STC1    | 1     |
| LMCD1      | CAD        | +     | YWHAZ   | 1     |
| SECISBP2L  | CAD        | +     | DYRK2   | 1     |
| RHOBTB3    | CAD        | +     | ENC1    | 1     |
| CPEB3      | CAD        | +     | WISP2   | 1     |
| ABLM3      | CAD        | +     | GPRC5A  | 1     |
| NMNAT2     | CAD        | +     | STX3    | 1     |
| KANK1      | CAD        | +     | ASPH    | 1     |
| ABCA12     | CAD        | +     | COL12A1 | 1     |
| NBEA       | CAD        | +     | EPHA4   | 1     |
| RRM2B      | CAD        | +     | RPS6KA3 | 1     |
| FAM49B     | CAD        | +     | MAP4K4  | 1     |
| FIGN       | CAD        | +     | GDF15   | 1     |
| STRADB     | CAD        | +     | ANXA3   | 1     |
| ERRF1      | CAD        | +     | RND3    | 1     |
| PTGFRN     | CAD        | +     | ELK3    | 1     |
| SEMA6A     | CAD        | +     | LMO7    | 1     |
| VAT1L      | CAD        | +     | PTPN14  | 1     |
| CFL2       | CAD        | +     | MAFB    | 1     |
| SUSD1      | CAD        | +     | ABCA1   | 1     |
| GPR87      | CAD        | +     | LAMC2   | 1     |
| DLC1       | CAD        | +     | LHFPL2  | 1     |
| ADPGK      | CAD        | +     | MAP1B   | 1     |
| HOOK3      | CAD        | +     | DLC1    | 1     |
| LCOR       | CAD        | +     | PCP4    | 1     |
| CCND1      | CAD        | +     | ZNF193  | 1     |
| ITGB1      | CAD        | +     | NEBL    | 1     |
| GLCCI1     | CAD        | +     | TRIM16  | 1     |
| TMEM45B    | CAD        | +     | BTG2    | 1     |
| MBNL2      | CAD        | +     | RAB31   | 1     |
| BTBD9      | CAD        | +     | SLC35D2 | 1     |
| TES        | CAD        | +     | PTPN21  | 1     |

**Table S1** Regulatory network definition of edge and node by Cytoscape. In the third column 'Up/Dn', '+' indicates the corresponding gene in the first columns is up-regulated, while '-' indicates down-regulation. The number in the column 'Group' indicates the group, with 1 for up-regulated genes, -1 for down-regulated genes, -2 for hub TFs, and 2 for TCF7L2 (continued)

| <i>Edge</i>       |                   |              | <i>Node</i> |              |
|-------------------|-------------------|--------------|-------------|--------------|
| <i>Name_Node1</i> | <i>Name_Node2</i> | <i>Up/Dn</i> | <i>Name</i> | <i>Group</i> |
| KANK1             | CAD               | +            | UBL3        | 1            |
| ABCA12            | CAD               | +            | DDAH1       | 1            |
| PGM2L1            | CAD               | +            | MGAT4A      | 1            |
| JAZF1             | CAD               | +            | LPHN2       | 1            |
| LONRF2            | CAD               | +            | SOCS5       | 1            |
| ARSB              | CAD               | +            | KSR1        | 1            |
| DOCK8             | CAD               | +            | C1orf9      | 1            |
| FREM2             | CAD               | +            | LYPD3       | 1            |
| ARSB              | FOXO1             | +            | TNFRSF21    | 1            |
| ATP7B             | FOXO1             | +            | SESN1       | 1            |
| COL5A1            | FOXO1             | +            | TNRC6A      | 1            |
| ITGA6             | FOXO1             | +            | LMCD1       | 1            |
| TGFBI             | FOXO1             | +            | SECISBP2L   | 1            |
| THBD              | FOXO1             | +            | RHOBTB3     | 1            |
| CDKN1A            | FOXO1             | +            | CPEB3       | 1            |
| COL5A2            | FOXO1             | +            | ABLIM3      | 1            |
| EXT2              | FOXO1             | +            | PHLPP2      | 1            |
| APP               | FOXO1             | +            | NMNAT2      | 1            |
| LTBP1             | FOXO1             | +            | KANK1       | 1            |
| CYP24A1           | FOXO1             | +            | TES         | 1            |
| MAOB              | FOXO1             | +            | ABCA12      | 1            |
| NPR3              | FOXO1             | +            | NBEA        | 1            |
| PAM               | FOXO1             | +            | RRM2B       | 1            |
| PPP3CA            | FOXO1             | +            | C1orf9      | 1            |
| PRLR              | FOXO1             | +            | FAM49B      | 1            |
| ATP2B1            | FOXO1             | +            | FIGN        | 1            |
| SERPINA1          | FOXO1             | +            | STRADB      | 1            |
| MGLL              | FOXO1             | +            | ERRFI1      | 1            |
| SHISA2            | FOXO1             | +            | PTGFRN      | 1            |
| ANO6              | FOXO1             | +            | SEMA6A      | 1            |
| VEGFA             | FOXO1             | +            | VAT1L       | 1            |
| GPR126            | FOXO1             | +            | CLDN1       | 1            |

**Table S1** Regulatory network definition of edge and node by Cytoscape. In the third column 'Up/Dn', '+' indicates the corresponding gene in the first columns is up-regulated, while '-' indicates down-regulation. The number in the column 'Group' indicates the group, with 1 for up-regulated genes, -1 for down-regulated genes, -2 for hub TFs, and 2 for TCF7L2 (continued)

| Edge       |            |       | Node    |       |
|------------|------------|-------|---------|-------|
| Name_Node1 | Name_Node2 | Up/Dn | Name    | Group |
| FHL2       | FOXO1      | +     | CFL2    | 1     |
| MAP2       | FOXO1      | +     | SUSD1   | 1     |
| HIPK3      | FOXO1      | +     | TNS3    | 1     |
| BMPR2      | FOXO1      | +     | AEN     | 1     |
| CDK8       | FOXO1      | +     | RNF38   | 1     |
| DDX3X      | FOXO1      | +     | OTUB2   | 1     |
| CAPN2      | FOXO1      | +     | GPR87   | 1     |
| SLC31A2    | FOXO1      | +     | DLC1    | 1     |
| EDN1       | FOXO1      | +     | FRAS1   | 1     |
| FRK        | FOXO1      | +     | DICER1  | 1     |
| GOLGA4     | FOXO1      | +     | ADPGK   | 1     |
| ITGB1      | FOXO1      | +     | C9orf5  | 1     |
| LAMC1      | FOXO1      | +     | HOOK3   | 1     |
| NT5E       | FOXO1      | +     | LCOR    | 1     |
| PDE7A      | FOXO1      | +     | KBTBD8  | 1     |
| PTK7       | FOXO1      | +     | PLEKHA8 | 1     |
| RBMS1      | FOXO1      | +     | STON2   | 1     |
| STC1       | FOXO1      | +     | CCND1   | 1     |
| YWHAZ      | FOXO1      | +     | FN1     | 1     |
| DYRK2      | FOXO1      | +     | ITGB1   | 1     |
| ENC1       | FOXO1      | +     | GLCCI1  | 1     |
| WISP2      | FOXO1      | +     | CFL2    | 1     |
| GPRC5A     | FOXO1      | +     | TMEM45B | 1     |
| STX3       | FOXO1      | +     | RNF145  | 1     |
| ASPH       | FOXO1      | +     | MBNL2   | 1     |
| COL12A1    | FOXO1      | +     | DCP2    | 1     |
| EPHA4      | FOXO1      | +     | BTBD9   | 1     |
| RPS6KA3    | FOXO1      | +     | TES     | 1     |
| MAP4K4     | FOXO1      | +     | KANK1   | 1     |
| GDF15      | FOXO1      | +     | ABCA12  | 1     |
| ANXA3      | FOXO1      | +     | PGM2L1  | 1     |
| RND3       | FOXO1      | +     | JAZF1   | 1     |

**Table S1** Regulatory network definition of edge and node by Cytoscape. In the third column 'Up/Dn', '+' indicates the corresponding gene in the first columns is up-regulated, while '-' indicates down-regulation. The number in the column 'Group' indicates the group, with 1 for up-regulated genes, -1 for down-regulated genes, -2 for hub TFs, and 2 for TCF7L2 (continued)

| <i>Edge</i>       |                   |              | <i>Node</i> |              |
|-------------------|-------------------|--------------|-------------|--------------|
| <i>Name_Node1</i> | <i>Name_Node2</i> | <i>Up/Dn</i> | <i>Name</i> | <i>Group</i> |
| ELK3              | FOXO1             | +            | DICER1      | 1            |
| LMO7              | FOXO1             | +            | PAQR7       | 1            |
| PTPN14            | FOXO1             | +            | DLC1        | 1            |
| ABCA1             | FOXO1             | +            | RNF38       | 1            |
| LHFPL2            | FOXO1             | +            | LONRF2      | 1            |
| DLC1              | FOXO1             | +            | ARSB        | 1            |
| NEBL              | FOXO1             | +            | C2CD2       | 1            |
| TRIM16            | FOXO1             | +            | FHL2        | 1            |
| BTG2              | FOXO1             | +            | DOCK8       | 1            |
| RAB31             | FOXO1             | +            | LTBP1       | 1            |
| SLC35D2           | FOXO1             | +            | FREM2       | 1            |
| PTPN21            | FOXO1             | +            | CAD         | -2           |
| UBL3              | FOXO1             | +            | FOXO1       | -2           |
| DDAH1             | FOXO1             | +            | GATA3       | -2           |
| MGAT4A            | FOXO1             | +            | TCF7L2      | 2            |
| LPHN2             | FOXO1             | +            | FBP1        | -1           |
| SOCS5             | FOXO1             | +            | BLVRB       | -1           |
| KSR1              | FOXO1             | +            | CRAT        | -1           |
| C1orf9            | FOXO1             | +            | RPL37       | -1           |
| LYPD3             | FOXO1             | +            | RPL38       | -1           |
| SESN1             | FOXO1             | +            | RPLP1       | -1           |
| TNRC6A            | FOXO1             | +            | ATP8B2      | -1           |
| LMCD1             | FOXO1             | +            | DBNL        | -1           |
| SECISBP2L         | FOXO1             | +            | ERGIC1      | -1           |
| RHOBTB3           | FOXO1             | +            | ABR         | -1           |
| CPEB3             | FOXO1             | +            | GMDS        | -1           |
| ABLIM3            | FOXO1             | +            | DDR1        | -1           |
| PHLPP2            | FOXO1             | +            | MYBL2       | -1           |
| NMNAT2            | FOXO1             | +            | SAT1        | -1           |
| KANK1             | FOXO1             | +            | TFF1        | -1           |
| TES               | FOXO1             | +            | TPD52L2     | -            |
| NBEA              | FOXO1             | +            | UNG         | -1           |

**Table S1** Regulatory network definition of edge and node by Cytoscape. In the third column 'Up/Dn', '+' indicates the corresponding gene in the first columns is up-regulated, while '-' indicates down-regulation. The number in the column 'Group' indicates the group, with 1 for up-regulated genes, -1 for down-regulated genes, -2 for hub TFs, and 2 for TCF7L2 (continued)

| Edge       |            |       | Node     |       |
|------------|------------|-------|----------|-------|
| Name_Node1 | Name_Node2 | Up/Dn | Name     | Group |
| C1orf9     | FOXO1      | +     | NR5A2    | -1    |
| FAM49B     | FOXO1      | +     | IER3     | -1    |
| FIGN       | FOXO1      | +     | CSRP1    | -1    |
| STRADB     | FOXO1      | +     | PKMYT1   | -1    |
| ERRFI1     | FOXO1      | +     | FKBP2    | -1    |
| PTGFRN     | FOXO1      | +     | NDUFB10  | -1    |
| SEMA6A     | FOXO1      | +     | MB       | -1    |
| VAT1L      | FOXO1      | +     | SFN      | -1    |
| CLDN1      | FOXO1      | +     | POLR2I   | -1    |
| CFL2       | FOXO1      | +     | AGPAT1   | -1    |
| SUSD1      | FOXO1      | +     | STARD10  | -1    |
| TNS3       | FOXO1      | +     | HNRNPUL1 | -1    |
| AEN        | FOXO1      | +     | RPL35    | -1    |
| OTUB2      | FOXO1      | +     | BRCA1    | -1    |
| GPR87      | FOXO1      | +     | EPB41L1  | -1    |
| DLC1       | FOXO1      | +     | KEAP1    | -1    |
| DICER1     | FOXO1      | +     | SPDEF    | -1    |
| C9orf5     | FOXO1      | +     | SSBP2    | -1    |
| LCOR       | FOXO1      | +     | MYO16    | -1    |
| KBTBD8     | FOXO1      | +     | ARL6IP1  | -1    |
| PLEKHA8    | FOXO1      | +     | YBX2     | -1    |
| STON2      | FOXO1      | +     | DCXR     | -1    |
| FN1        | FOXO1      | +     | TREX1    | -1    |
| ITGB1      | FOXO1      | +     | C17orf59 | -1    |
| GLCCI1     | FOXO1      | +     | SLC35C1  | -1    |
| CFL2       | FOXO1      | +     | ATP8B2   | -1    |
| TMEM45B    | FOXO1      | +     | ZFAND3   | -1    |
| RNF145     | FOXO1      | +     | GGCT     | -1    |
| MBNL2      | FOXO1      | +     | GALNT12  | -1    |
| DCP2       | FOXO1      | +     | ADCK4    | -1    |
| TES        | FOXO1      | +     | C10orf81 | -1    |
| KANK1      | FOXO1      | +     | SLC37A3  | -1    |

**Table S1** Regulatory network definition of edge and node by Cytoscape. In the third column 'Up/Dn', '+' indicates the corresponding gene in the first columns is up-regulated, while '-' indicates down-regulation. The number in the column 'Group' indicates the group, with 1 for up-regulated genes, -1 for down-regulated genes, -2 for hub TFs, and 2 for TCF7L2 (continued)

| <i>Edge</i>       |                   |              | <i>Node</i> |              |
|-------------------|-------------------|--------------|-------------|--------------|
| <i>Name_Node1</i> | <i>Name_Node2</i> | <i>Up/Dn</i> | <i>Name</i> | <i>Group</i> |
| ABCA12            | FOXO1             | +            | AGPAT1      | -1           |
| PGM2L1            | FOXO1             | +            | C19orf33    | -1           |
| JAZF1             | FOXO1             | +            | SLC44A1     | -1           |
| DLC1              | FOXO1             | +            | HNRNPUL1    | -1           |
| LONRF2            | FOXO1             | +            | PKHD1L1     | -1           |
| ARSB              | FOXO1             | +            | H2AFJ       | -1           |
| C2CD2             | FOXO1             | +            | NUDT1       | -1           |
| FHL2              | FOXO1             | +            | ABCG1       | -1           |
| DOCK8             | FOXO1             | +            | AP1         | -2           |
| LTBP1             | FOXO1             | +            | AP2A        | -2           |
| FREM2             | FOXO1             | +            | PBF         | -2           |
| ARSB              | GATA3             | +            |             |              |
| COL5A1            | GATA3             | +            |             |              |
| GALC              | GATA3             | +            |             |              |
| ITGA6             | GATA3             | +            |             |              |
| TGFBI             | GATA3             | +            |             |              |
| THBD              | GATA3             | +            |             |              |
| CDKN1A            | GATA3             | +            |             |              |
| COL5A2            | GATA3             | +            |             |              |
| EXT2              | GATA3             | +            |             |              |
| APP               | GATA3             | +            |             |              |
| CXCL12            | GATA3             | +            |             |              |
| LTBP1             | GATA3             | +            |             |              |
| CYP24A1           | GATA3             | +            |             |              |
| MAOB              | GATA3             | +            |             |              |
| PAM               | GATA3             | +            |             |              |
| PPP3CA            | GATA3             | +            |             |              |
| PRLR              | GATA3             | +            |             |              |
| ATP2B1            | GATA3             | +            |             |              |
| MGLL              | GATA3             | +            |             |              |
| TULP4             | GATA3             | +            |             |              |
| ANO6              | GATA3             | +            |             |              |



**Table S1** Regulatory network definition of edge and node by Cytoscape. In the third column 'Up/Dn', '+' indicates the corresponding gene in the first columns is up-regulated, while '-' indicates down-regulation. The number in the column 'Group' indicates the group, with 1 for up-regulated genes, -1 for down-regulated genes, -2 for hub TFs, and 2 for TCF7L2 (continued)

| <i>Edge</i>       |                   |              | <i>Node</i> |              |
|-------------------|-------------------|--------------|-------------|--------------|
| <i>Name_Node1</i> | <i>Name_Node2</i> | <i>Up/Dn</i> | <i>Name</i> | <i>Group</i> |
| GPR126            | GATA3             | +            |             |              |
| NPNT              | GATA3             | +            |             |              |
| CYFIP2            | GATA3             | +            |             |              |
| FHL2              | GATA3             | +            |             |              |
| MAP2              | GATA3             | +            |             |              |
| BMPR2             | GATA3             | +            |             |              |
| DDX3X             | GATA3             | +            |             |              |
| CAPN2             | GATA3             | +            |             |              |
| SLC31A2           | GATA3             | +            |             |              |
| EDN1              | GATA3             | +            |             |              |
| FN1               | GATA3             | +            |             |              |
| FRK               | GATA3             | +            |             |              |
| ITGB1             | GATA3             | +            |             |              |
| LAMC1             | GATA3             | +            |             |              |
| LRP1              | GATA3             | +            |             |              |
| NT5E              | GATA3             | +            |             |              |
| PDE7A             | GATA3             | +            |             |              |
| RBMS1             | GATA3             | +            |             |              |
| SORL1             | GATA3             | +            |             |              |
| STC1              | GATA3             | +            |             |              |
| YWHAZ             | GATA3             | +            |             |              |
| DYRK2             | GATA3             | +            |             |              |
| ENC1              | GATA3             | +            |             |              |
| WISP2             | GATA3             | +            |             |              |
| GPRC5A            | GATA3             | +            |             |              |
| STX3              | GATA3             | +            |             |              |
| ASPH              | GATA3             | +            |             |              |
| COL12A1           | GATA3             | +            |             |              |
| EPHA4             | GATA3             | +            |             |              |
| RPS6KA3           | GATA3             | +            |             |              |
| ANXA3             | GATA3             | +            |             |              |
| RND3              | GATA3             | +            |             |              |

**Table S1** Regulatory network definition of edge and node by Cytoscape. In the third column 'Up/Dn', '+' indicates the corresponding gene in the first columns is up-regulated, while '-' indicates down-regulation. The number in the column 'Group' indicates the group, with 1 for up-regulated genes, -1 for down-regulated genes, -2 for hub TFs, and 2 for TCF7L2 (continued)

| <i>Edge</i>       |                   |              | <i>Node</i> |              |
|-------------------|-------------------|--------------|-------------|--------------|
| <i>Name_Node1</i> | <i>Name_Node2</i> | <i>Up/Dn</i> | <i>Name</i> | <i>Group</i> |
| ELK3              | GATA3             | +            |             |              |
| LMO7              | GATA3             | +            |             |              |
| PTPN14            | GATA3             | +            |             |              |
| MAFB              | GATA3             | +            |             |              |
| ABCA1             | GATA3             | +            |             |              |
| LAMC2             | GATA3             | +            |             |              |
| LHFPL2            | GATA3             | +            |             |              |
| MAP1B             | GATA3             | +            |             |              |
| DLC1              | GATA3             | +            |             |              |
| NEBL              | GATA3             | +            |             |              |
| TRIM16            | GATA3             | +            |             |              |
| BTG2              | GATA3             | +            |             |              |
| RAB31             | GATA3             | +            |             |              |
| SLC35D2           | GATA3             | +            |             |              |
| PTPN21            | GATA3             | +            |             |              |
| UBL3              | GATA3             | +            |             |              |
| MGAT4A            | GATA3             | +            |             |              |
| LPHN2             | GATA3             | +            |             |              |
| SOCS5             | GATA3             | +            |             |              |
| KSR1              | GATA3             | +            |             |              |
| C1orf9            | GATA3             | +            |             |              |
| LYPD3             | GATA3             | +            |             |              |
| TNFRSF21          | GATA3             | +            |             |              |
| SESN1             | GATA3             | +            |             |              |
| TNRC6A            | GATA3             | +            |             |              |
| LMCD1             | GATA3             | +            |             |              |
| SECISBP2L         | GATA3             | +            |             |              |
| RHOBTB3           | GATA3             | +            |             |              |
| CPEB3             | GATA3             | +            |             |              |
| ABLIM3            | GATA3             | +            |             |              |
| PHLPP2            | GATA3             | +            |             |              |
| NMNAT2            | GATA3             | +            |             |              |

**Table S1** Regulatory network definition of edge and node by Cytoscape. In the third column 'Up/Dn', '+' indicates the corresponding gene in the first columns is up-regulated, while '-' indicates down-regulation. The number in the column 'Group' indicates the group, with 1 for up-regulated genes, -1 for down-regulated genes, -2 for hub TFs, and 2 for TCF7L2 (continued)

| <i>Edge</i>       |                   |              | <i>Node</i> |              |
|-------------------|-------------------|--------------|-------------|--------------|
| <i>Name_Node1</i> | <i>Name_Node2</i> | <i>Up/Dn</i> | <i>Name</i> | <i>Group</i> |
| KANK1             | GATA3             | +            |             |              |
| TES               | GATA3             | +            |             |              |
| ABCA12            | GATA3             | +            |             |              |
| NBEA              | GATA3             | +            |             |              |
| FAM49B            | GATA3             | +            |             |              |
| FIGN              | GATA3             | +            |             |              |
| STRADB            | GATA3             | +            |             |              |
| ERRFI1            | GATA3             | +            |             |              |
| PTGFRN            | GATA3             | +            |             |              |
| SEMA6A            | GATA3             | +            |             |              |
| CLDN1             | GATA3             | +            |             |              |
| CFL2              | GATA3             | +            |             |              |
| SUSD1             | GATA3             | +            |             |              |
| TNS3              | GATA3             | +            |             |              |
| AEN               | GATA3             | +            |             |              |
| OTUB2             | GATA3             | +            |             |              |
| DLC1              | GATA3             | +            |             |              |
| C9orf5            | GATA3             | +            |             |              |
| LCOR              | GATA3             | +            |             |              |
| PLEKHA8           | GATA3             | +            |             |              |
| STON2             | GATA3             | +            |             |              |
| CCND1             | GATA3             | +            |             |              |
| FN1               | GATA3             | +            |             |              |
| ITGB1             | GATA3             | +            |             |              |
| GLCCI1            | GATA3             | +            |             |              |
| CFL2              | GATA3             | +            |             |              |
| RNF145            | GATA3             | +            |             |              |
| MBNL2             | GATA3             | +            |             |              |
| BTBD9             | GATA3             | +            |             |              |
| TES               | GATA3             | +            |             |              |
| KANK1             | GATA3             | +            |             |              |
| ABCA12            | GATA3             | +            |             |              |

**Table S1** Regulatory network definition of edge and node by Cytoscape. In the third column 'Up/Dn', '+' indicates the corresponding gene in the first columns is up-regulated, while '-' indicates down-regulation. The number in the column 'Group' indicates the group, with 1 for up-regulated genes, -1 for down-regulated genes, -2 for hub TFs, and 2 for TCF7L2 (continued)

| <i>Edge</i>       |                   |              | <i>Node</i> |              |
|-------------------|-------------------|--------------|-------------|--------------|
| <i>Name_Node1</i> | <i>Name_Node2</i> | <i>Up/Dn</i> | <i>Name</i> | <i>Group</i> |
| PGM2L1            | GATA3             | +            |             |              |
| JAZF1             | GATA3             | +            |             |              |
| PAQR7             | GATA3             | +            |             |              |
| DLC1              | GATA3             | +            |             |              |
| LONRF2            | GATA3             | +            |             |              |
| FHL2              | GATA3             | +            |             |              |
| LTBP1             | GATA3             | +            |             |              |
| FREM2             | GATA3             | +            |             |              |
| ITGA6             | TCF7L2            | +            |             |              |
| TGFBI             | TCF7L2            | +            |             |              |
| THBD              | TCF7L2            | +            |             |              |
| CDKN1A            | TCF7L2            | +            |             |              |
| COL5A2            | TCF7L2            | +            |             |              |
| EXT2              | TCF7L2            | +            |             |              |
| APP               | TCF7L2            | +            |             |              |
| CXCL12            | TCF7L2            | +            |             |              |
| LTBP1             | TCF7L2            | +            |             |              |
| CYP24A1           | TCF7L2            | +            |             |              |
| MAOB              | TCF7L2            | +            |             |              |
| NPR3              | TCF7L2            | +            |             |              |
| PAM               | TCF7L2            | +            |             |              |
| PPP3CA            | TCF7L2            | +            |             |              |
| PRLR              | TCF7L2            | +            |             |              |
| SERPINA1          | TCF7L2            | +            |             |              |
| MGLL              | TCF7L2            | +            |             |              |
| TULP4             | TCF7L2            | +            |             |              |
| SHISA2            | TCF7L2            | +            |             |              |
| VEGFA             | TCF7L2            | +            |             |              |
| GPR126            | TCF7L2            | +            |             |              |
| CYFIP2            | TCF7L2            | +            |             |              |
| FHL2              | TCF7L2            | +            |             |              |
| HIPK3             | TCF7L2            | +            |             |              |

**Table S1** Regulatory network definition of edge and node by Cytoscape. In the third column 'Up/Dn', '+' indicates the corresponding gene in the first columns is up-regulated, while '-' indicates down-regulation. The number in the column 'Group' indicates the group, with 1 for up-regulated genes, -1 for down-regulated genes, -2 for hub TFs, and 2 for TCF7L2 (continued)

| Edge       |            |       | Node |       |
|------------|------------|-------|------|-------|
| Name_Node1 | Name_Node2 | Up/Dn | Name | Group |
| BMPR2      | TCF7L2     | +     |      |       |
| CDK8       | TCF7L2     | +     |      |       |
| DDX3X      | TCF7L2     | +     |      |       |
| SLC31A2    | TCF7L2     | +     |      |       |
| EDN1       | TCF7L2     | +     |      |       |
| FN1        | TCF7L2     | +     |      |       |
| FRK        | TCF7L2     | +     |      |       |
| ITGB1      | TCF7L2     | +     |      |       |
| LAMC1      | TCF7L2     | +     |      |       |
| LRP1       | TCF7L2     | +     |      |       |
| NT5E       | TCF7L2     | +     |      |       |
| PDE7A      | TCF7L2     | +     |      |       |
| PTK7       | TCF7L2     | +     |      |       |
| RBMS1      | TCF7L2     | +     |      |       |
| SORL1      | TCF7L2     | +     |      |       |
| DYRK2      | TCF7L2     | +     |      |       |
| ENC1       | TCF7L2     | +     |      |       |
| GPRC5A     | TCF7L2     | +     |      |       |
| STX3       | TCF7L2     | +     |      |       |
| ASPH       | TCF7L2     | +     |      |       |
| COL12A1    | TCF7L2     | +     |      |       |
| EPHA4      | TCF7L2     | +     |      |       |
| RPS6KA3    | TCF7L2     | +     |      |       |
| MAP4K4     | TCF7L2     | +     |      |       |
| RND3       | TCF7L2     | +     |      |       |
| LMO7       | TCF7L2     | +     |      |       |
| PTPN14     | TCF7L2     | +     |      |       |
| ABCA1      | TCF7L2     | +     |      |       |
| LAMC2      | TCF7L2     | +     |      |       |
| LHFPL2     | TCF7L2     | +     |      |       |
| DLC1       | TCF7L2     | +     |      |       |
| PCP4       | TCF7L2     | +     |      |       |

**Table S1** Regulatory network definition of edge and node by Cytoscape. In the third column 'Up/Dn', '+' indicates the corresponding gene in the first columns is up-regulated, while '-' indicates down-regulation. The number in the column 'Group' indicates the group, with 1 for up-regulated genes, -1 for down-regulated genes, -2 for hub TFs, and 2 for TCF7L2 (continued)

| <i>Edge</i>       |                   |              | <i>Node</i> |              |
|-------------------|-------------------|--------------|-------------|--------------|
| <i>Name_Node1</i> | <i>Name_Node2</i> | <i>Up/Dn</i> | <i>Name</i> | <i>Group</i> |
| NEBL              | TCF7L2            | +            |             |              |
| BTG2              | TCF7L2            | +            |             |              |
| RAB31             | TCF7L2            | +            |             |              |
| SLC35D2           | TCF7L2            | +            |             |              |
| PTPN21            | TCF7L2            | +            |             |              |
| UBL3              | TCF7L2            | +            |             |              |
| DDAH1             | TCF7L2            | +            |             |              |
| MGAT4A            | TCF7L2            | +            |             |              |
| LPHN2             | TCF7L2            | +            |             |              |
| SOCS5             | TCF7L2            | +            |             |              |
| KSR1              | TCF7L2            | +            |             |              |
| C1orf9            | TCF7L2            | +            |             |              |
| TNFRSF21          | TCF7L2            | +            |             |              |
| SESN1             | TCF7L2            | +            |             |              |
| LMCD1             | TCF7L2            | +            |             |              |
| RHOBTB3           | TCF7L2            | +            |             |              |
| PHLPP2            | TCF7L2            | +            |             |              |
| KANK1             | TCF7L2            | +            |             |              |
| NBEA              | TCF7L2            | +            |             |              |
| RRM2B             | TCF7L2            | +            |             |              |
| FAM49B            | TCF7L2            | +            |             |              |
| FIGN              | TCF7L2            | +            |             |              |
| STRADB            | TCF7L2            | +            |             |              |
| PTGFRN            | TCF7L2            | +            |             |              |
| SEMA6A            | TCF7L2            | +            |             |              |
| VAT1L             | TCF7L2            | +            |             |              |
| CLDN1             | TCF7L2            | +            |             |              |
| SUSD1             | TCF7L2            | +            |             |              |
| TNS3              | TCF7L2            | +            |             |              |
| AEN               | TCF7L2            | +            |             |              |
| ADPGK             | TCF7L2            | +            |             |              |
| C9orf5            | TCF7L2            | +            |             |              |

**Table S1** Regulatory network definition of edge and node by Cytoscape. In the third column 'Up/Dn', '+' indicates the corresponding gene in the first columns is up-regulated, while '-' indicates down-regulation. The number in the column 'Group' indicates the group, with 1 for up-regulated genes, -1 for down-regulated genes, -2 for hub TFs, and 2 for TCF7L2 (continued)

| Edge       |            |       | Node |       |
|------------|------------|-------|------|-------|
| Name_Node1 | Name_Node2 | Up/Dn | Name | Group |
| KBTBD8     | TCF7L2     | +     |      |       |
| PLEKHA8    | TCF7L2     | +     |      |       |
| STON2      | TCF7L2     | +     |      |       |
| ITGB1      | TCF7L2     | +     |      |       |
| GLCCI1     | TCF7L2     | +     |      |       |
| RNF145     | TCF7L2     | +     |      |       |
| MBNL2      | TCF7L2     | +     |      |       |
| DCP2       | TCF7L2     | +     |      |       |
| TES        | TCF7L2     | +     |      |       |
| JAZF1      | TCF7L2     | +     |      |       |
| DLC1       | TCF7L2     | +     |      |       |
| RNF38      | TCF7L2     | +     |      |       |
| LONRF2     | TCF7L2     | +     |      |       |
| FHL2       | TCF7L2     | +     |      |       |
| DOCK8      | TCF7L2     | +     |      |       |
| LTBP1      | TCF7L2     | +     |      |       |
| FREM2      | TCF7L2     | +     |      |       |
| FBP1       | AP1        | -     |      |       |
| BLVRB      | AP1        | -     |      |       |
| CRAT       | AP1        | -     |      |       |
| RPL38      | AP1        | -     |      |       |
| RPLP1      | AP1        | -     |      |       |
| ATP8B2     | AP1        | -     |      |       |
| DBNL       | AP1        | -     |      |       |
| ERGIC1     | AP1        | -     |      |       |
| ABR        | AP1        | -     |      |       |
| GMDS       | AP1        | -     |      |       |
| DDR1       | AP1        | -     |      |       |
| MYBL2      | AP1        | -     |      |       |
| SAT1       | AP1        | -     |      |       |
| TFF1       | AP1        | -     |      |       |
| TPD52L2    | AP1        | -     |      |       |

**Table S1** Regulatory network definition of edge and node by Cytoscape. In the third column 'Up/Dn', '+' indicates the corresponding gene in the first columns is up-regulated, while '-' indicates down-regulation. The number in the column 'Group' indicates the group, with 1 for up-regulated genes, -1 for down-regulated genes, -2 for hub TFs, and 2 for TCF7L2 (continued)

| <i>Edge</i>       |                   |              | <i>Node</i> |              |
|-------------------|-------------------|--------------|-------------|--------------|
| <i>Name_Node1</i> | <i>Name_Node2</i> | <i>Up/Dn</i> | <i>Name</i> | <i>Group</i> |
| UNG               | AP1               | -            |             |              |
| NR5A2             | AP1               | -            |             |              |
| IER3              | AP1               | -            |             |              |
| CSRP1             | AP1               | -            |             |              |
| PKMYT1            | AP1               | -            |             |              |
| FKBP2             | AP1               | -            |             |              |
| MB                | AP1               | -            |             |              |
| AGPAT1            | AP1               | -            |             |              |
| STARD10           | AP1               | -            |             |              |
| RPL35             | AP1               | -            |             |              |
| EPB41L1           | AP1               | -            |             |              |
| SSBP2             | AP1               | -            |             |              |
| MYO16             | AP1               | -            |             |              |
| ARL6IP1           | AP1               | -            |             |              |
| DCXR              | AP1               | -            |             |              |
| ZFAND3            | AP1               | -            |             |              |
| ADCK4             | AP1               | -            |             |              |
| SLC37A3           | AP1               | -            |             |              |
| AGPAT1            | AP1               | -            |             |              |
| C19orf33          | AP1               | -            |             |              |
| HNRNPUL1          | AP1               | -            |             |              |
| PKHD1L1           | AP1               | -            |             |              |
| ABCG1             | AP1               | -            |             |              |
| RPL37             | AP2A              | -            |             |              |
| RPL38             | AP2A              | -            |             |              |
| RPLP1             | AP2A              | -            |             |              |
| ATP8B2            | AP2A              | -            |             |              |
| DBNL              | AP2A              | -            |             |              |
| ERGIC1            | AP2A              | -            |             |              |
| ABR               | AP2A              | -            |             |              |
| DDR1              | AP2A              | -            |             |              |
| MYBL2             | AP2A              | -            |             |              |



**Table S1** Regulatory network definition of edge and node by Cytoscape. In the third column 'Up/Dn', '+' indicates the corresponding gene in the first columns is up-regulated, while '-' indicates down-regulation. The number in the column 'Group' indicates the group, with 1 for up-regulated genes, -1 for down-regulated genes, -2 for hub TFs, and 2 for TCF7L2 (continued)

| Edge       |            |       | Node |       |
|------------|------------|-------|------|-------|
| Name_Node1 | Name_Node2 | Up/Dn | Name | Group |
| SAT1       | AP2A       | -     |      |       |
| TFF1       | AP2A       | -     |      |       |
| TPD52L2    | AP2A       | -     |      |       |
| UNG        | AP2A       | -     |      |       |
| IER3       | AP2A       | -     |      |       |
| CSRP1      | AP2A       | -     |      |       |
| PKMYT1     | AP2A       | -     |      |       |
| FKBP2      | AP2A       | -     |      |       |
| NDUFB10    | AP2A       | -     |      |       |
| MB         | AP2A       | -     |      |       |
| SFN        | AP2A       | -     |      |       |
| POLR2I     | AP2A       | -     |      |       |
| STARD10    | AP2A       | -     |      |       |
| HNRNPUL1   | AP2A       | -     |      |       |
| RPL35      | AP2A       | -     |      |       |
| KEAP1      | AP2A       | -     |      |       |
| SPDEF      | AP2A       | -     |      |       |
| MYO16      | AP2A       | -     |      |       |
| ARL6IP1    | AP2A       | -     |      |       |
| YBX2       | AP2A       | -     |      |       |
| DCXR       | AP2A       | -     |      |       |
| ATP8B2     | AP2A       | -     |      |       |
| ZFAND3     | AP2A       | -     |      |       |
| GALNT12    | AP2A       | -     |      |       |
| ADCK4      | AP2A       | -     |      |       |
| SLC37A3    | AP2A       | -     |      |       |
| AGPAT1     | AP2A       | -     |      |       |
| PKHD1L1    | AP2A       | -     |      |       |
| NUDT1      | AP2A       | -     |      |       |
| ABCG1      | AP2A       | -     |      |       |
| BLVRB      | GATA3      | -     |      |       |
| CRAT       | GATA3      | -     |      |       |

**Table S1** Regulatory network definition of edge and node by Cytoscape. In the third column 'Up/Dn', '+' indicates the corresponding gene in the first columns is up-regulated, while '-' indicates down-regulation. The number in the column 'Group' indicates the group, with 1 for up-regulated genes, -1 for down-regulated genes, -2 for hub TFs, and 2 for TCF7L2 (continued)

| <i>Edge</i>       |                   |              | <i>Node</i> |              |
|-------------------|-------------------|--------------|-------------|--------------|
| <i>Name_Node1</i> | <i>Name_Node2</i> | <i>Up/Dn</i> | <i>Name</i> | <i>Group</i> |
| RPL37             | GATA3             | -            |             |              |
| RPL38             | GATA3             | -            |             |              |
| ATP8B2            | GATA3             | -            |             |              |
| ERGIC1            | GATA3             | -            |             |              |
| GMDS              | GATA3             | -            |             |              |
| DDR1              | GATA3             | -            |             |              |
| SAT1              | GATA3             | -            |             |              |
| TFF1              | GATA3             | -            |             |              |
| UNG               | GATA3             | -            |             |              |
| NR5A2             | GATA3             | -            |             |              |
| IER3              | GATA3             | -            |             |              |
| PKMYT1            | GATA3             | -            |             |              |
| FKBP2             | GATA3             | -            |             |              |
| MB                | GATA3             | -            |             |              |
| SFN               | GATA3             | -            |             |              |
| POLR2I            | GATA3             | -            |             |              |
| AGPAT1            | GATA3             | -            |             |              |
| STARD10           | GATA3             | -            |             |              |
| HNRNPUL1          | GATA3             | -            |             |              |
| RPL35             | GATA3             | -            |             |              |
| BRCA1             | GATA3             | -            |             |              |
| SPDEF             | GATA3             | -            |             |              |
| SSBP2             | GATA3             | -            |             |              |
| MYO16             | GATA3             | -            |             |              |
| ARL6IP1           | GATA3             | -            |             |              |
| DCXR              | GATA3             | -            |             |              |
| SLC35C1           | GATA3             | -            |             |              |
| ATP8B2            | GATA3             | -            |             |              |
| ZFAND3            | GATA3             | -            |             |              |
| GALNT12           | GATA3             | -            |             |              |
| ADCK4             | GATA3             | -            |             |              |
| C10orf81          | GATA3             | -            |             |              |

**Table S1** Regulatory network definition of edge and node by Cytoscape. In the third column 'Up/Dn', '+' indicates the corresponding gene in the first columns is up-regulated, while '-' indicates down-regulation. The number in the column 'Group' indicates the group, with 1 for up-regulated genes, -1 for down-regulated genes, -2 for hub TFs, and 2 for TCF7L2 (continued)

| <i>Edge</i>       |                   |              | <i>Node</i> |              |
|-------------------|-------------------|--------------|-------------|--------------|
| <i>Name_Node1</i> | <i>Name_Node2</i> | <i>Up/Dn</i> | <i>Name</i> | <i>Group</i> |
| AGPAT1            | GATA3             | -            |             |              |
| C19orf33          | GATA3             | -            |             |              |
| SLC44A1           | GATA3             | -            |             |              |
| PKHD1L1           | GATA3             | -            |             |              |
| H2AFJ             | GATA3             | -            |             |              |
| FBP1              | PBF               | -            |             |              |
| CRAT              | PBF               | -            |             |              |
| RPL37             | PBF               | -            |             |              |
| RPL38             | PBF               | -            |             |              |
| RPLP1             | PBF               | -            |             |              |
| ATP8B2            | PBF               | -            |             |              |
| ERGIC1            | PBF               | -            |             |              |
| GMDS              | PBF               | -            |             |              |
| SAT1              | PBF               | -            |             |              |
| TFF1              | PBF               | -            |             |              |
| TPD52L2           | PBF               | -            |             |              |
| UNG               | PBF               | -            |             |              |
| NR5A2             | PBF               | -            |             |              |
| IER3              | PBF               | -            |             |              |
| CSRP1             | PBF               | -            |             |              |
| PKMYT1            | PBF               | -            |             |              |
| FKBP2             | PBF               | -            |             |              |
| NDUFB10           | PBF               | -            |             |              |
| SFN               | PBF               | -            |             |              |
| STARD10           | PBF               | -            |             |              |
| HNRNPUL1          | PBF               | -            |             |              |
| BRCA1             | PBF               | -            |             |              |
| EPB41L1           | PBF               | -            |             |              |
| MYO16             | PBF               | -            |             |              |
| ARL6IP1           | PBF               | -            |             |              |
| DCXR              | PBF               | -            |             |              |
| TREX1             | PBF               | -            |             |              |

**Table S1** Regulatory network definition of edge and node by Cytoscape. In the third column 'Up/Dn', '+' indicates the corresponding gene in the first columns is up-regulated, while '-' indicates down-regulation. The number in the column 'Group' indicates the group, with 1 for up-regulated genes, -1 for down-regulated genes, -2 for hub TFs, and 2 for TCF7L2 (continued)

| <i>Edge</i>       |                   |              | <i>Node</i> |              |
|-------------------|-------------------|--------------|-------------|--------------|
| <i>Name_Node1</i> | <i>Name_Node2</i> | <i>Up/Dn</i> | <i>Name</i> | <i>Group</i> |
| C17orf59          | PBF               | -            |             |              |
| SLC35C1           | PBF               | -            |             |              |
| ZFAND3            | PBF               | -            |             |              |
| GGCT              | PBF               | -            |             |              |
| GALNT12           | PBF               | -            |             |              |
| ADCK4             | PBF               | -            |             |              |
| C10orf81          | PBF               | -            |             |              |
| SLC37A3           | PBF               | -            |             |              |
| AGPAT1            | PBF               | -            |             |              |
| C19orf33          | PBF               | -            |             |              |
| HNRNPUL1          | PBF               | -            |             |              |
| PKHD1L1           | PBF               | -            |             |              |
| H2AFJ             | PBF               | -            |             |              |
| NUDT1             | PBF               | -            |             |              |
| ABCG1             | PBF               | -            |             |              |
| CRAT              | TCF7L2            | -            |             |              |
| RPL38             | TCF7L2            | -            |             |              |
| RPLP1             | TCF7L2            | -            |             |              |
| DBNL              | TCF7L2            | -            |             |              |
| ERGIC1            | TCF7L2            | -            |             |              |
| ABR               | TCF7L2            | -            |             |              |
| GMDS              | TCF7L2            | -            |             |              |
| SAT1              | TCF7L2            | -            |             |              |
| UNG               | TCF7L2            | -            |             |              |
| NR5A2             | TCF7L2            | -            |             |              |
| IER3              | TCF7L2            | -            |             |              |
| STARD10           | TCF7L2            | -            |             |              |
| BRCA1             | TCF7L2            | -            |             |              |
| EPB41L1           | TCF7L2            | -            |             |              |
| KEAP1             | TCF7L2            | -            |             |              |
| SSBP2             | TCF7L2            | -            |             |              |
| MYO16             | TCF7L2            | -            |             |              |

**Table S1** Regulatory network definition of edge and node by Cytoscape. In the third column 'Up/Dn', '+' indicates the corresponding gene in the first columns is up-regulated, while '-' indicates down-regulation. The number in the column 'Group' indicates the group, with 1 for up-regulated genes, -1 for down-regulated genes, -2 for hub TFs, and 2 for TCF7L2 (continued)

| <i>Edge</i>       |                   |              | <i>Node</i> |              |
|-------------------|-------------------|--------------|-------------|--------------|
| <i>Name_Node1</i> | <i>Name_Node2</i> | <i>Up/Dn</i> | <i>Name</i> | <i>Group</i> |
| ARL6IP1           | TCF7L2            | -            |             |              |
| ATP8B2            | TCF7L2            | -            |             |              |
| ADCK4             | TCF7L2            | -            |             |              |
| AGPAT1            | TCF7L2            | -            |             |              |
| C19orf33          | TCF7L2            | -            |             |              |
| SLC44A1           | TCF7L2            | -            |             |              |
| PKHD1L1           | TCF7L2            | -            |             |              |
